# Supplementary material for: Thermo-Mechanical and Creep Behaviour of Polylactic Acid/Thermoplastic Polyurethane Blends
Source: MDPI journal article supplement (doi:10.3390/polym14235276), 2022-12-02
Supplement: s1 [file s1]

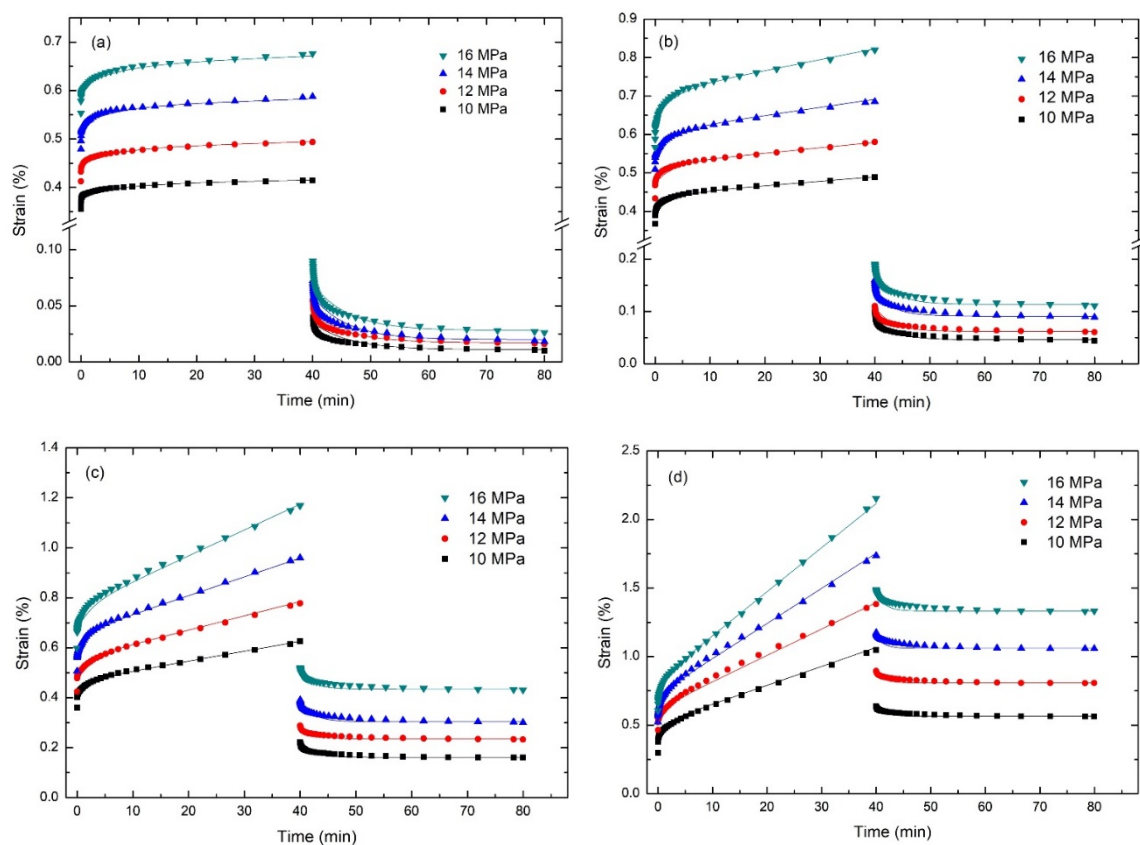

**Figure S1.** Creep curves for PLA under different stresses at different temperatures: (a) 10 °C (b) 20 °C (c) 30 °C (d) 40 °C.

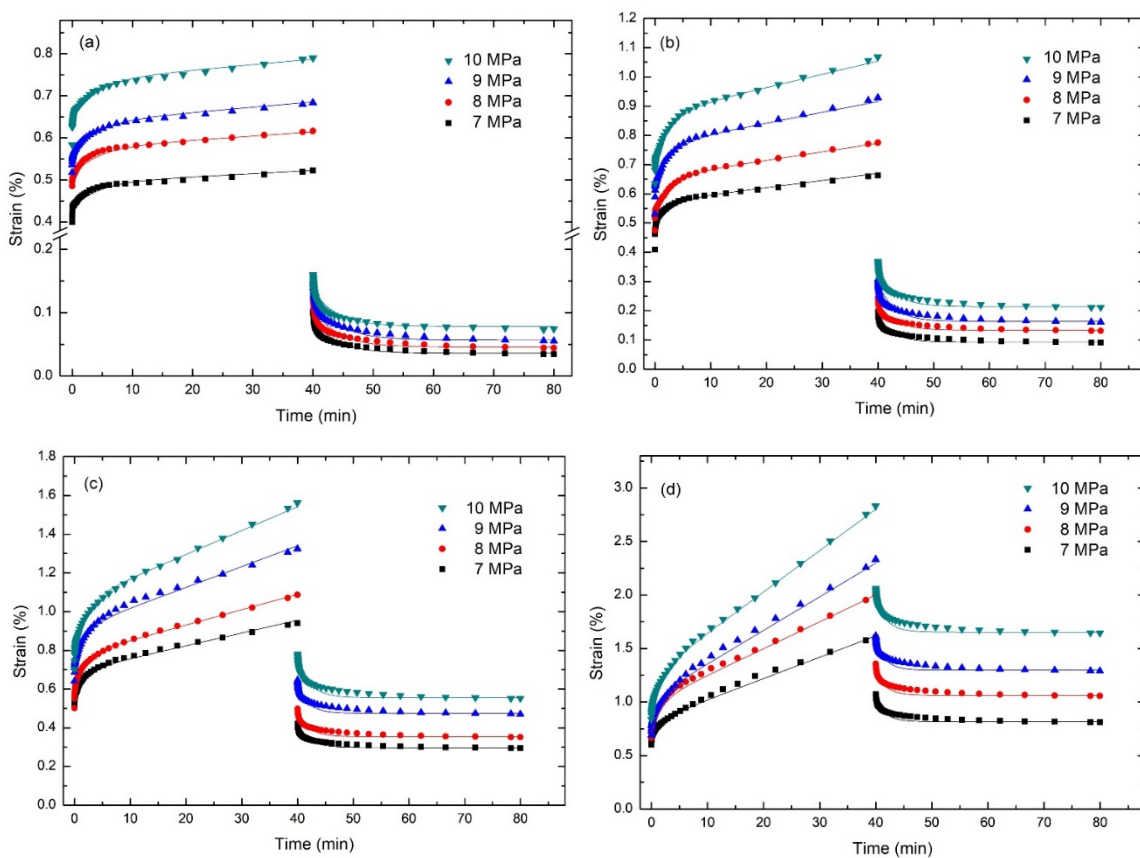

**Figure S2.** Creep curves for PLA70/TPU30 under different stresses at different temperatures: (a) 10 °C (b) 20 °C (c) 30 °C (d) 40 °C.

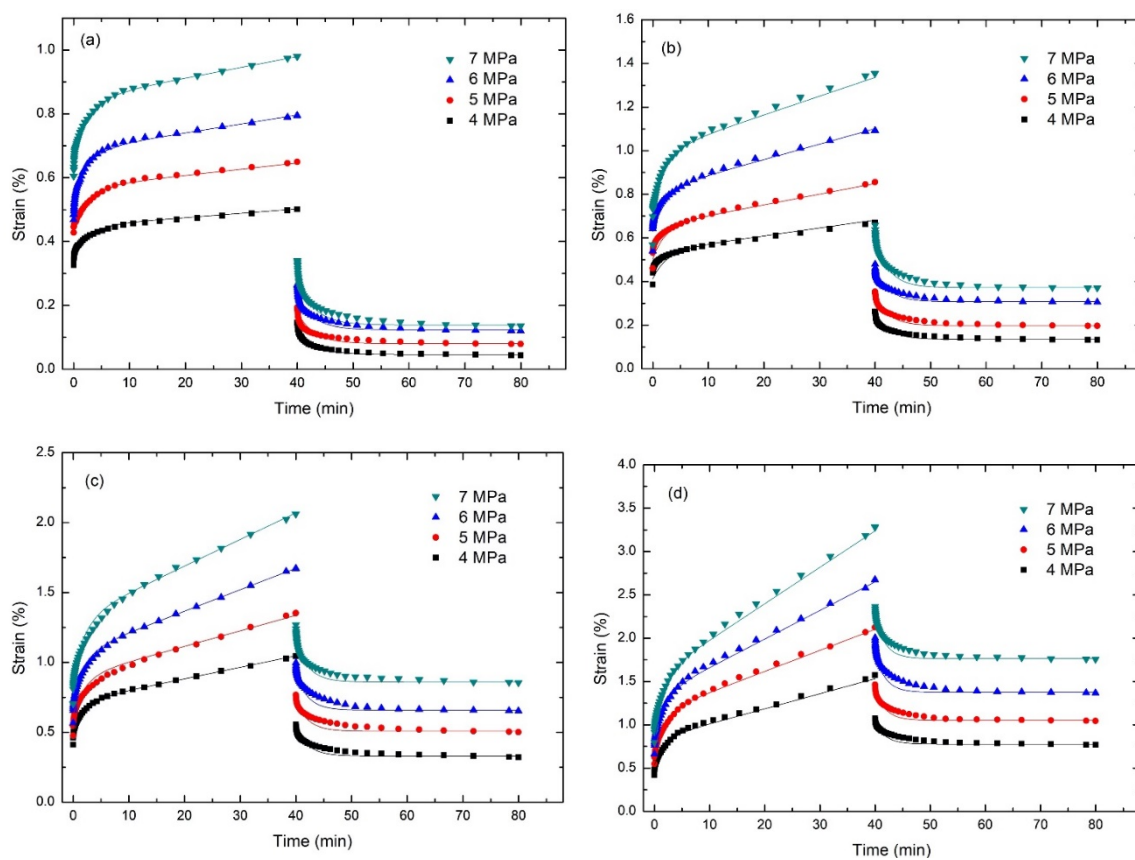

**Figure S3.** Creep curves for PLA50/TPU50 under different stresses at different temperatures: (a) 10 °C (b) 20 °C (c) 30 °C (d) 40 °C.

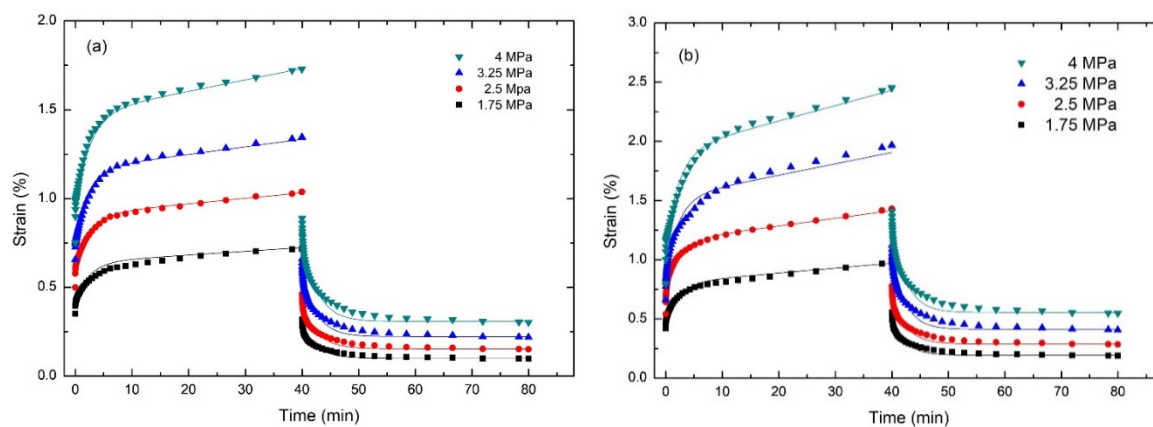

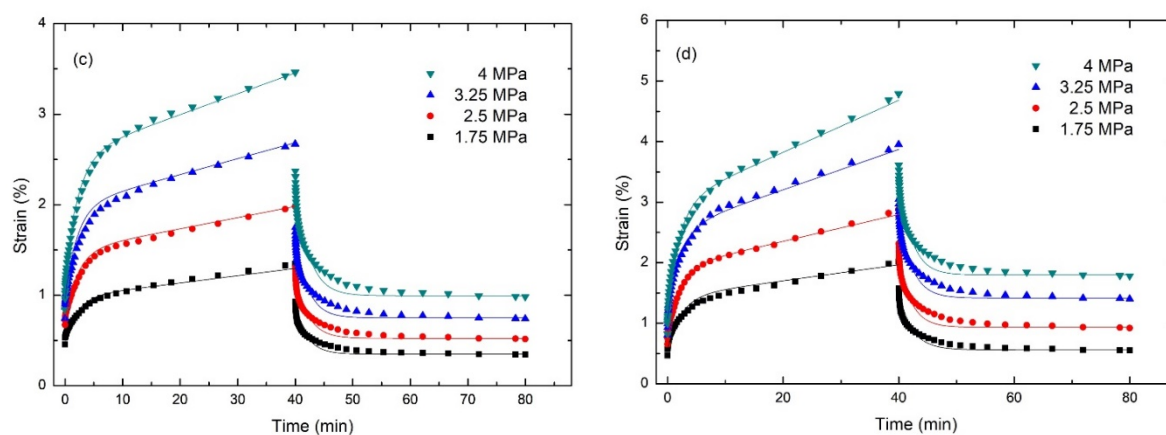

**Figure S4.** Creep curves for PLA30/TPU70 under different stresses at different temperatures: (a) 10 °C (b) 20 °C (c) 30 °C (d) 40 °C.

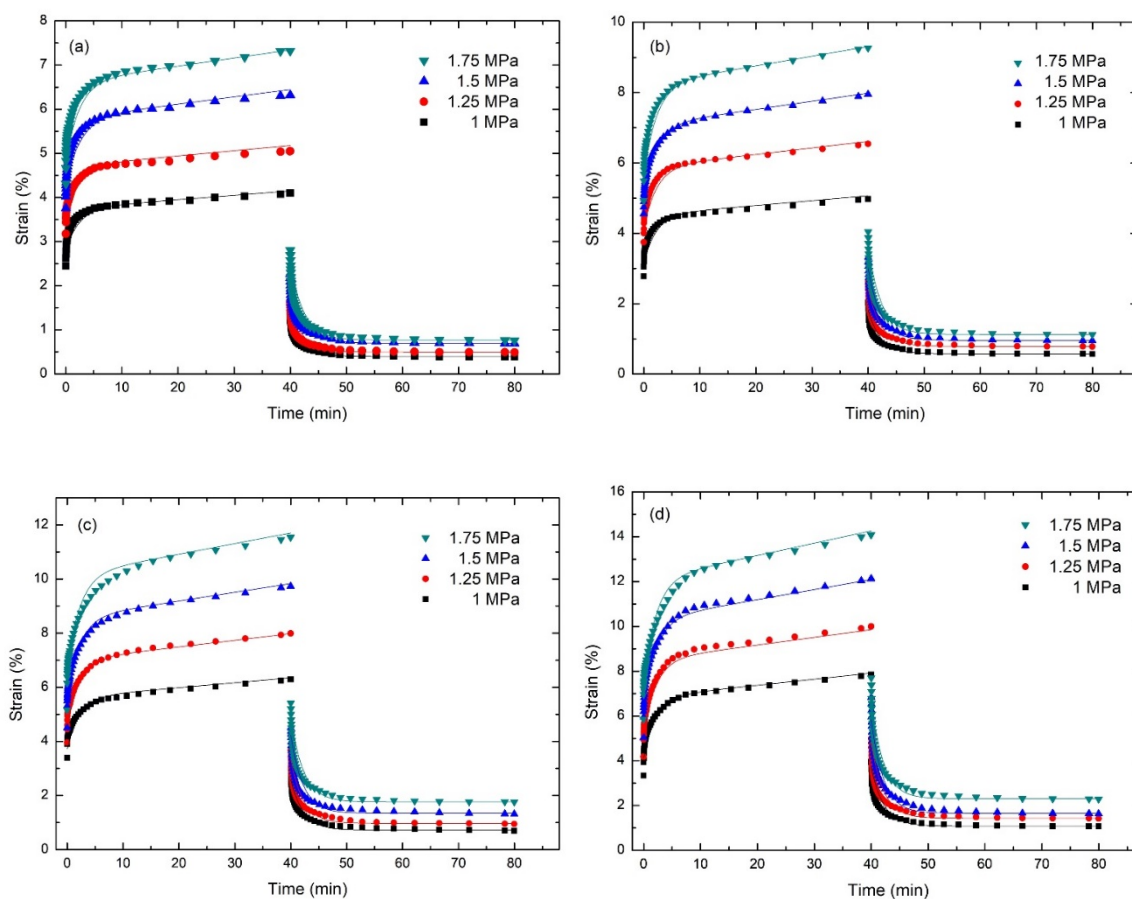

**Figure S5.** Creep curves for TPU under different stresses at different temperatures: (a) 10 °C (b) 20 °C (c) 30 °C (d) 40 °C.

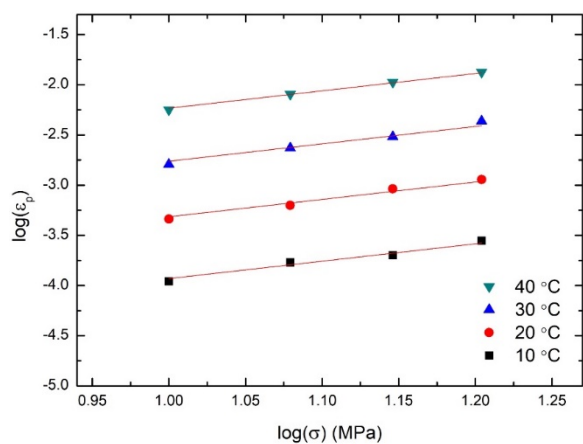

(a)

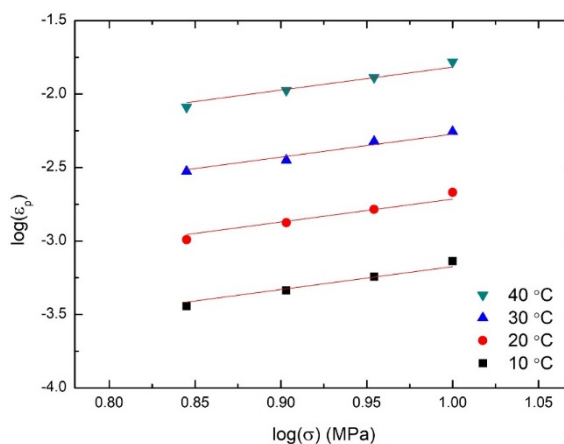

(b)

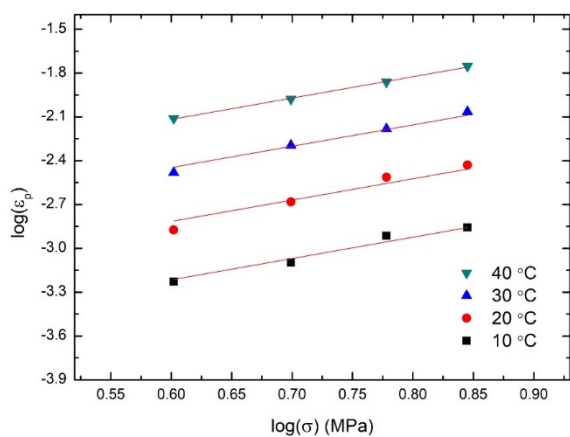

(c)

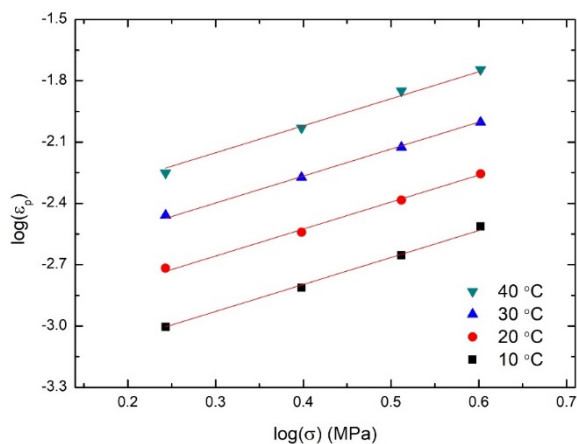

(d)

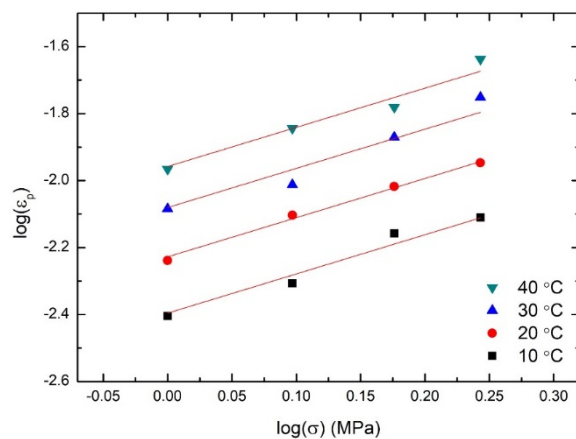

(e)

**Figure S6.** Stress dependence of the plastic strain at different creep temperatures for the recovery of (a) PLA, (b) PLA/TPU blend with 70:30 for the ratio of PLA to TPU, (c) PLA/TPU blend with 50:50 for the ratio of PLA to TPU, (d) PLA/TPU blend with 30:70 for the ratio of PLA to TPU, and (e) TPU.

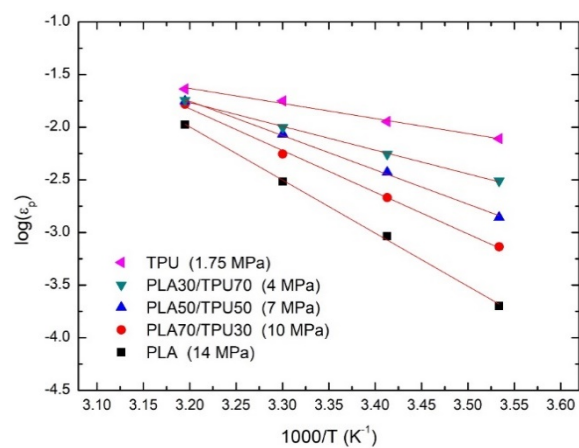

**Figure S7.** Temperature dependence of the plastic strain for the recovery of the PLA/TPU blends under different stresses.
